# Supplementary material for: Benthic Diatom Blooms of Blue Haslea spp. in the Mediterranean Sea
Source: MDPI journal article supplement (doi:10.3390/md21110583), 2023-11-08
Supplement: s1 [file s1]

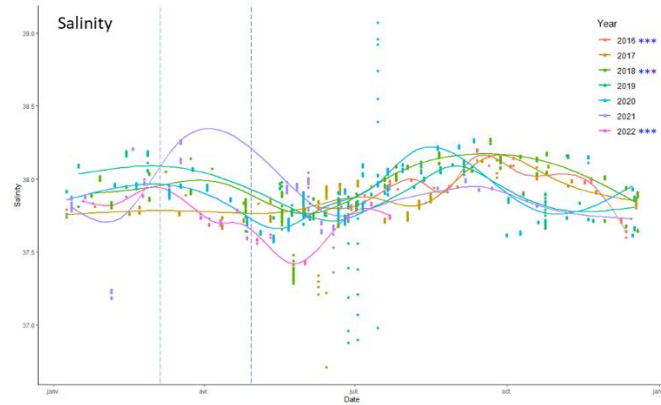

**Figure S1.** Yearly salinity (PSU) evolution over the last seven years in Calvi Bay, dashes lines represent the maximum blooms period, the asterisks refer to years with intense blooms.

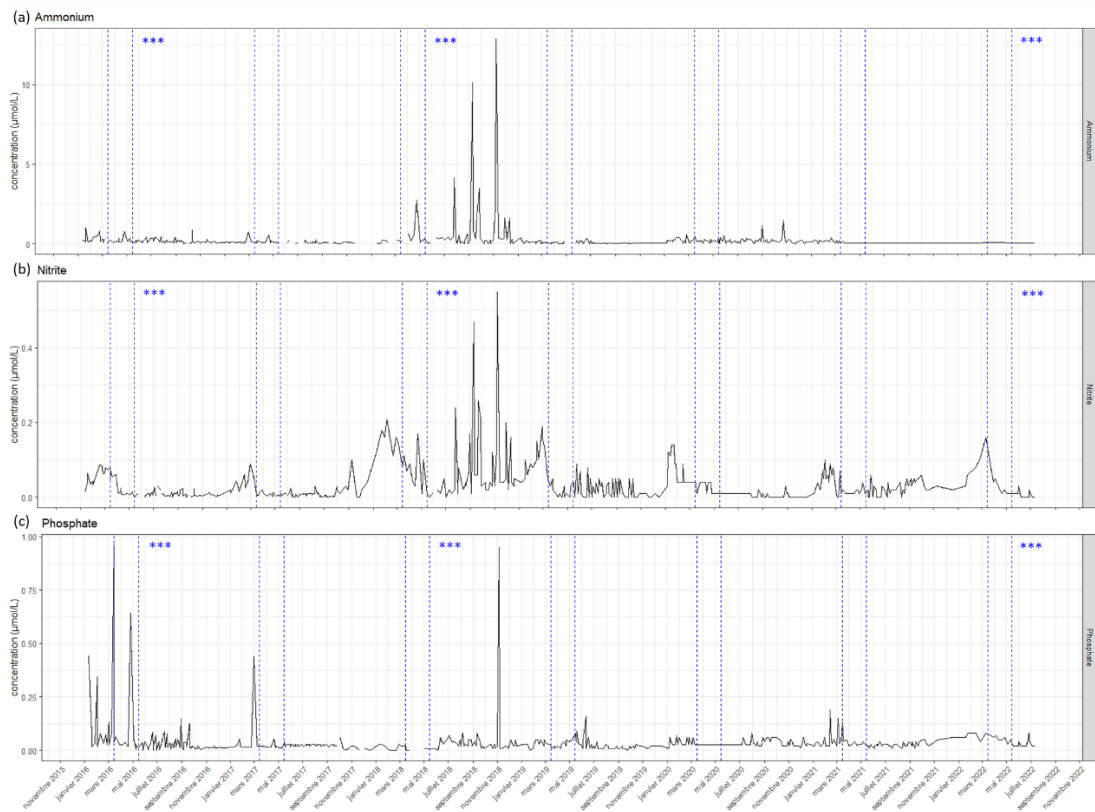

**Figure S2.** Ammonium, Nitrite and Phosphate concentrations, in  $\mu\text{mol/L}$ , evolution over the last seven years in Calvi Bay, dashes lines represent the maximum blooms period, the asterisks refer to years with intense blooms.

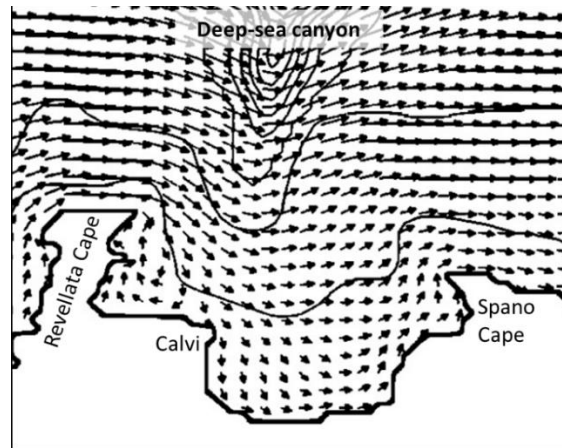

**Figure S3.** Subsurface current in Calvi Bay during low wind conditions (modelised by Skliris *et al.* 2001).

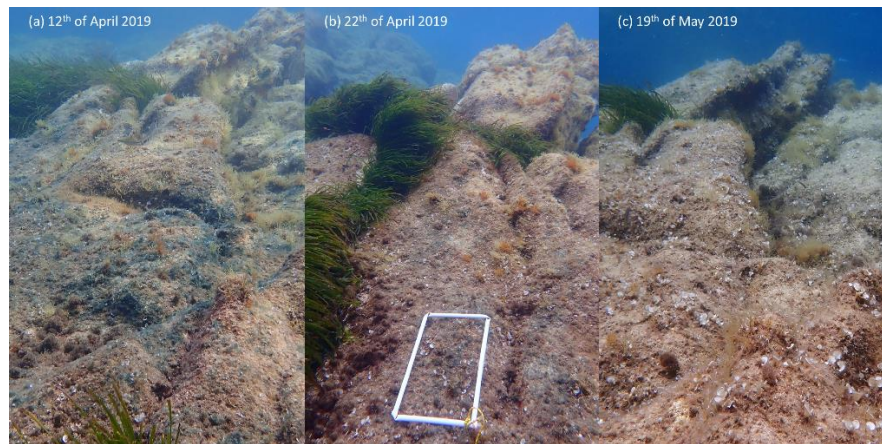

**Figure S4.** Decreased of blue *Haslea* bloom, a) seasonal maximum of the bloom, b) bloom after the strong wind and swell event and c) ending of the bloom.
